# Supplementary material for: MiR-150-5p May Contribute to Pathogenesis of Human Leiomyoma via Regulation of the Akt/p27Kip1 Pathway In Vitro
Source: MDPI journal article supplement (doi:10.3390/ijms20112684), 2019-05-31
Supplement: s1 [file s1]

| Sample | Table2 | Figure1 | Figure2 | Figure4 | Figure5 | Figure 6 |
|--------|--------|---------|---------|---------|---------|----------|
| #1     | ○      | ○       | ○       | ○       | ○       | ○        |
| #2     | ○      | ○       | ○       | ○       | ○       | ○        |
| #3     | ○      | ○       |         |         |         |          |
| #4     | ○      | ○       |         |         |         |          |
| #5     | ○      | ○       |         | ○       | ○       | ○        |
| #6     | ○      | ○       |         | ○       |         | ○        |
| #7     | ○      | ○       | ○       | ○       | ○       | ○        |
| #8     | ○      | ○       |         |         | ○       |          |
| #9     | ○      | ○       | ○       | ○       | ○       | ○        |
| #10    | ○      | ○       |         | ○       |         |          |
| #11    | ○      | ○       |         |         |         |          |
| #12    | ○      | ○       |         |         | ○       |          |
| #13    | ○      | ○       |         |         |         |          |

**Supplementary Table 1.** Table2, Figure1 and Figure 4 were experiments using leiomyoma tissue and the remainder were experiments using cultured leiomyoma cells. In Table 2 and Figure 1, all 13 samples were used. Samples #1,#2,#7, and #9 provided enough cells; however, in samples #3,#4,#11,#13, cells were not cultured well and did not provide adequate amounts of cells. Samples #1,#2,#7, and #9 are representative samples of this study and were used in all experimental steps. For the experiment, these four samples were used as a basis and additional samples were added as needed for each experiment.
